# Supplementary material
Source: PubMed Central journal article supplement (PMC4167066)
Supplement: jp505727w_si_001.pdf [file jp505727w_si_001.pdf]

# Supporting Information

## Conformational Preferences of DNA in Reduced Dielectric Environments

*Asli Yildirim<sup>†</sup>, Monika Sharma<sup>‡</sup>, Bradley Michael Varner<sup>†</sup>, Liang Fang<sup>‡</sup>, Michael Feig<sup>\*,†,‡</sup>*

<sup>†</sup>Department of Chemistry, Michigan State University, East Lansing, Michigan 48824, United States

<sup>‡</sup>Department of Biochemistry & Molecular Biology, Michigan State University, East Lansing, Michigan 48824, United States

### AUTHOR INFORMATION

#### **Corresponding Author**

\*603 Wilson Road

Room BCH 218

East Lansing, MI

48824

USA

Phone: 517-432-7439

E-mail: [feig@msu.edu](mailto:feig@msu.edu)

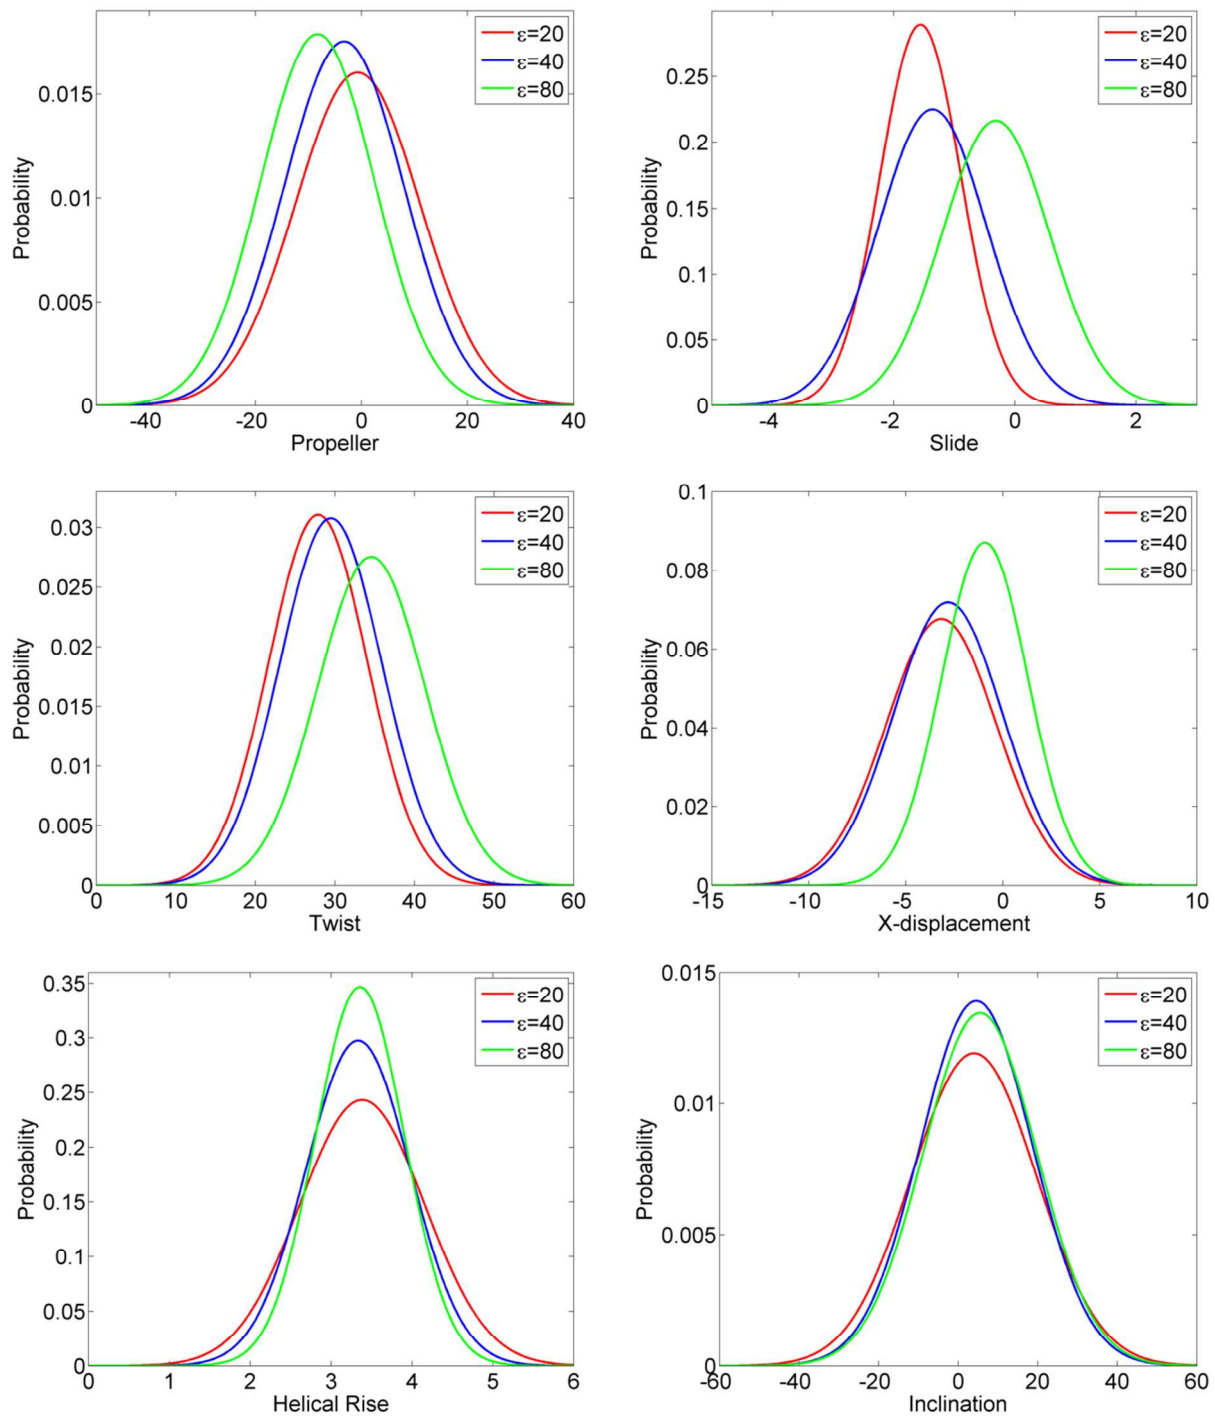

**Figure S1.** Distributions of helical parameters for the GC-rich dodecamer in different dielectric environments with  $\epsilon=20$  (red), 40 (blue) and 80 (green).

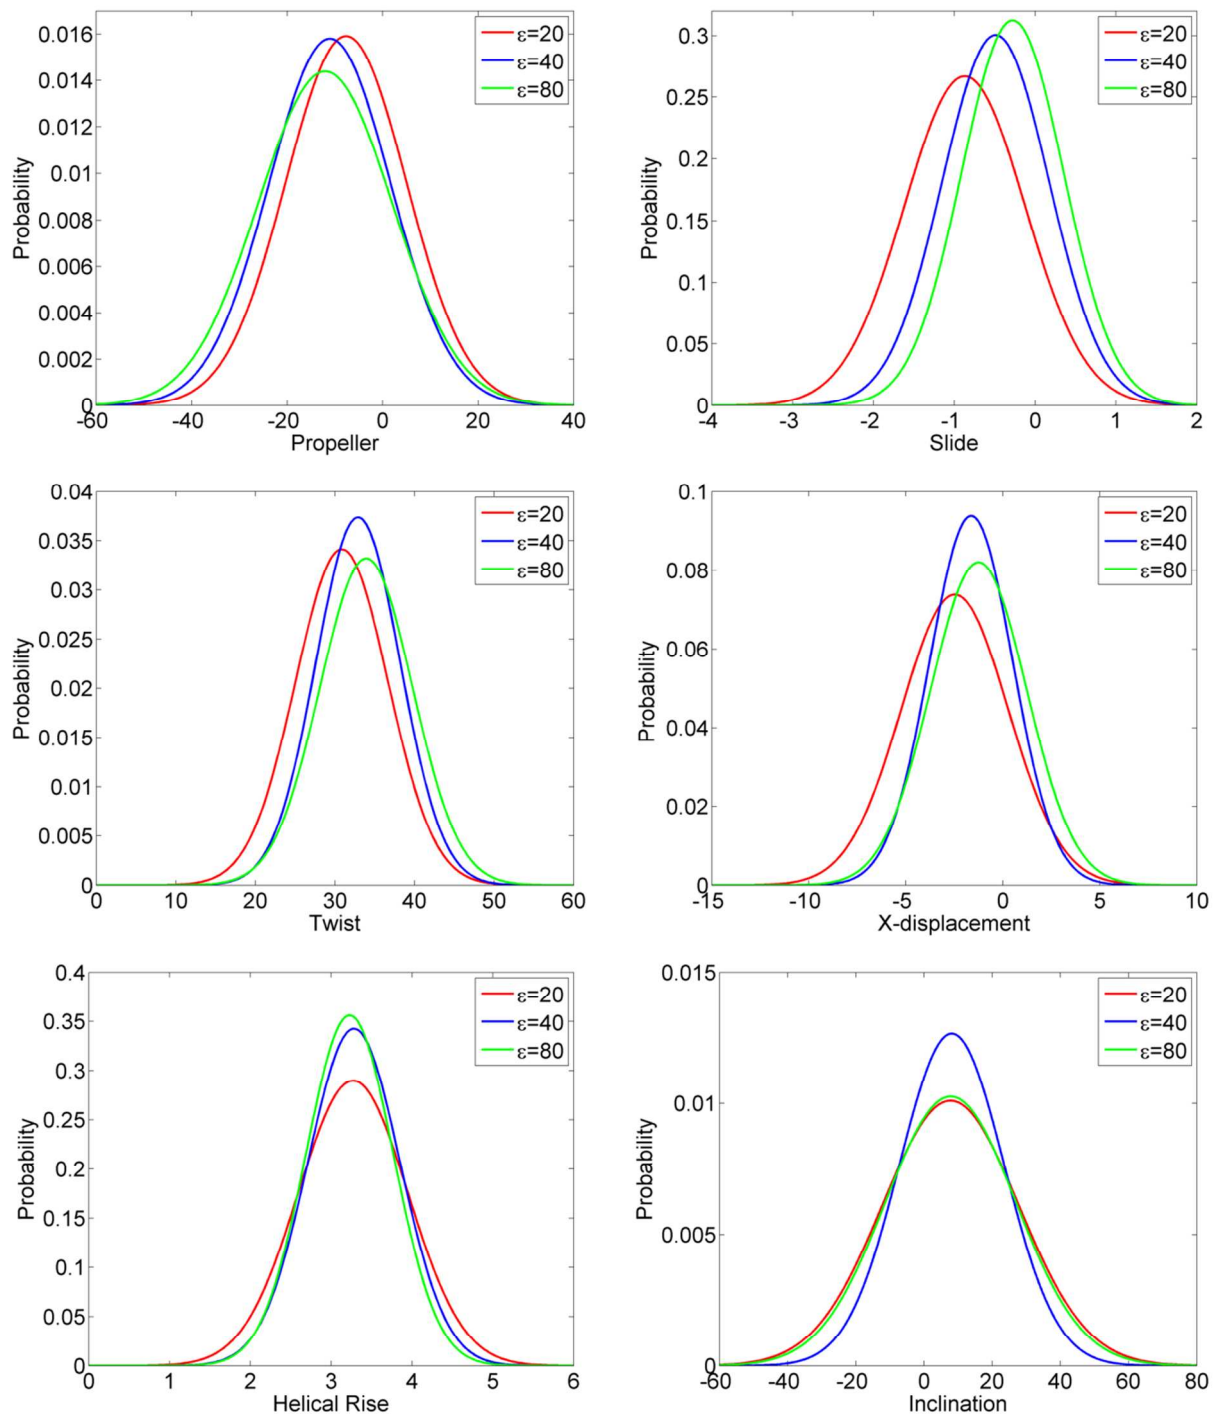

**Figure S2.** Distributions of helicoidal parameters for the Drew-Dickerson dodecamer in different dielectric environments with  $\epsilon=20$  (red), 40 (blue) and 80 (green).

**Table S1.** Helicoidal Parameters for GC1, GC2, GC5 clusters compared to canonical A-, B- and C-DNA forms

|                       | <b>A-DNA</b>  | <b>B-DNA</b>  | <b>C-DNA<sup>a</sup></b> | <b>GC1</b>    | <b>GC2</b>   | <b>GC5</b>    |
|-----------------------|---------------|---------------|--------------------------|---------------|--------------|---------------|
| <b>Propeller</b>      | -9.00 (7.08)  | -11.72 (5.77) | -2.01                    | -2.67 (11.77) | -1.78 (9.73) | -8.07 (10.89) |
| <b>Slide</b>          | -1.67 (0.42)  | 0.17 (0.68)   | 0.09                     | -1.23 (0.50)  | -1.90 (0.45) | -0.21 (0.61)  |
| <b>Twist</b>          | 30.24 (4.02)  | 34.81 (5.66)  | 38.06                    | 30.55 (5.23)  | 27.48 (5.33) | 34.11 (5.86)  |
| <b>X-displacement</b> | -4.54 (1.26)  | -0.13 (1.09)  | 0.82                     | -2.62 (2.29)  | -3.95 (2.23) | -0.88 (1.71)  |
| <b>H-rise</b>         | 2.77 (0.52)   | 3.25 (0.16)   | 3.31                     | 3.40 (0.71)   | 3.46 (0.77)  | 3.39 (0.51)   |
| <b>Inclination</b>    | 16.00 (10.68) | 4.01 (6.74)   | -8.07                    | 3.22 (14.77)  | 1.65 (13.63) | 4.85 (12.22)  |
| <b>Minor Groove</b>   | 9.92 (0.72)   | 10.77 (0.91)  | 10.6                     | 14.9 (0.37)   | 15.49 (0.42) | 13.77 (1.20)  |
| <b>Major Groove</b>   | 7.14 (2.38)   | 17.14 (0.93)  | 16.1                     | 20.60 (0.90)  | 21.70 (0.92) | 18.04 (1.25)  |

<sup>a</sup>Parameters are calculated for canonical C-DNA form using 3DNA program package.

**Table S2.** Helicoidal Parameters for DD1, DD2, DD3 clusters compared to canonical A-, B- and C-DNA forms

|                       | <b>A-DNA</b>  | <b>B-DNA</b>  | <b>C-DNA<sup>a</sup></b> | <b>DD1</b>    | <b>DD2</b>    | <b>DD3</b>     |
|-----------------------|---------------|---------------|--------------------------|---------------|---------------|----------------|
| <b>Propeller</b>      | -9.00 (7.08)  | -11.72 (5.77) | -2.01                    | -9.65 (10.93) | -5.32 (12.00) | -12.23 (12.33) |
| <b>Slide</b>          | -1.67 (0.42)  | 0.17 (0.68)   | 0.09                     | -0.64 (0.50)  | -1.04 (0.72)  | -0.41 (0.52)   |
| <b>Twist</b>          | 30.24 (4.02)  | 34.81 (5.66)  | 38.06                    | 32.47 (4.81)  | 30.41 (6.21)  | 34.12 (4.85)   |
| <b>X-displacement</b> | -4.54 (1.26)  | -0.13 (1.09)  | 0.82                     | -1.80 (2.05)  | -2.55 (2.84)  | -1.12 (2.05)   |
| <b>H-rise</b>         | 2.77 (0.52)   | 3.25 (0.16)   | 3.31                     | 3.23 (0.56)   | 3.22 (0.71)   | 3.21 (0.49)    |
| <b>Inclination</b>    | 16.00 (10.68) | 4.01 (6.74)   | -8.07                    | 7.03 (17.42)  | 5.38 (20.32)  | 4.20 (18.65)   |
| <b>Minor Groove</b>   | 9.92 (0.72)   | 10.77 (0.91)  | 10.6                     | 14.42 (0.52)  | 14.86 (0.42)  | 13.74 (0.58)   |
| <b>Major Groove</b>   | 7.14 (2.38)   | 17.14 (0.93)  | 16.1                     | 19.16 (0.93)  | 21.38 (1.16)  | 18.23 (0.90)   |

<sup>a</sup>Parameters are calculated for canonical C-DNA form using 3DNA program package.
